# Supplementary material for: An effective strategy for preparing nickel nanoparticles encapsulated in polymer matrix-derived carbon shell with high catalytic activity and long-term durability toward urea electro-oxidation
Source: Royal Society of Chemistry journal article supplement (doi:10.1039/d1qm00305d), 2021-01-01
Supplement: d1qm00305d1.pdf [file d1qm00305d1.pdf]

## Electronic Supplementary Information

### **An effective strategy for preparing nickel nanoparticles encapsulated in polymer matrix-derived carbon shell with high catalytic activity and long-term durability toward urea electro-oxidation**

Quang Thien Luong<sup>a,†</sup>, Sun Young Kang<sup>b,†</sup>, Dohyeon Lee<sup>a</sup>, Jihyeok Song<sup>a</sup>, Mohanraju Karuppannan<sup>a</sup>, Yong-Hun Cho<sup>c,\*</sup>, and Oh Joong Kwon<sup>a,\*</sup>

<sup>a</sup>Department of Energy and Chemical Engineering and Innovation Centre for Chemical Engineering, Incheon National University, 119 Academy-ro, Yeonsu-gu, Incheon 22012, Republic of Korea

<sup>b</sup>School of Chemical and Biological Engineering, Seoul National University, Seoul 08826, Republic of Korea

<sup>c</sup>Department of Chemical Engineering, Kangwon National University, Samcheok 25913, Republic of Korea

**Table S1.** Mass activity, electrochemical surface area (ECSA), and specific activity of different Ni@nCS/CNF catalysts

| <b>Catalyst</b> | <b>Mass activity<sup>i</sup><br/>(A/g)</b> | <b>ECSA<sup>ii</sup><br/>(m<sup>2</sup>/g)</b> | <b>Specific activity<sup>iii</sup><br/>(A/m<sup>2</sup>)</b> |
|-----------------|--------------------------------------------|------------------------------------------------|--------------------------------------------------------------|
| Ni@2CS/CNF      | 1561.2                                     | 161.1                                          | 9.69                                                         |
| Ni@1.5CS/CNF    | 1470                                       | 159.4                                          | 9.22                                                         |
| Ni@CS/CNF       | 1415.7                                     | 207                                            | 6.84                                                         |
| Ni@0.75CS/CNF   | 1219.7                                     | 147.3                                          | 8.28                                                         |
| Ni@0.5CS/CNF    | 578.6                                      | 93.2                                           | 6.21                                                         |
| Ni@0.25CS/CNF   | 472.9                                      | 56.2                                           | 8.41                                                         |

<sup>i</sup> Mass activity was calculated by dividing the anodic peak current density by nickel loading amount.

<sup>ii</sup> ECSA was estimated following the equation:  $ECSA = Q / (m \times 0.257)$ , where Q is the charge relating to Ni<sup>3+</sup>/Ni<sup>2+</sup> conversion; m is nickel loading amount and the value 0.257 mC cm<sup>-2</sup> is the charge required for the formation of a monolayer of Ni<sup>2+</sup>. Q was calculated by integrating the reduction peaks from CV curves measured in the absence of urea (This method for calculating the ECSA has been reported in previous studies<sup>1-3</sup>).

<sup>iii</sup> Specific activity was calculated by dividing the mass activity by ECSA.

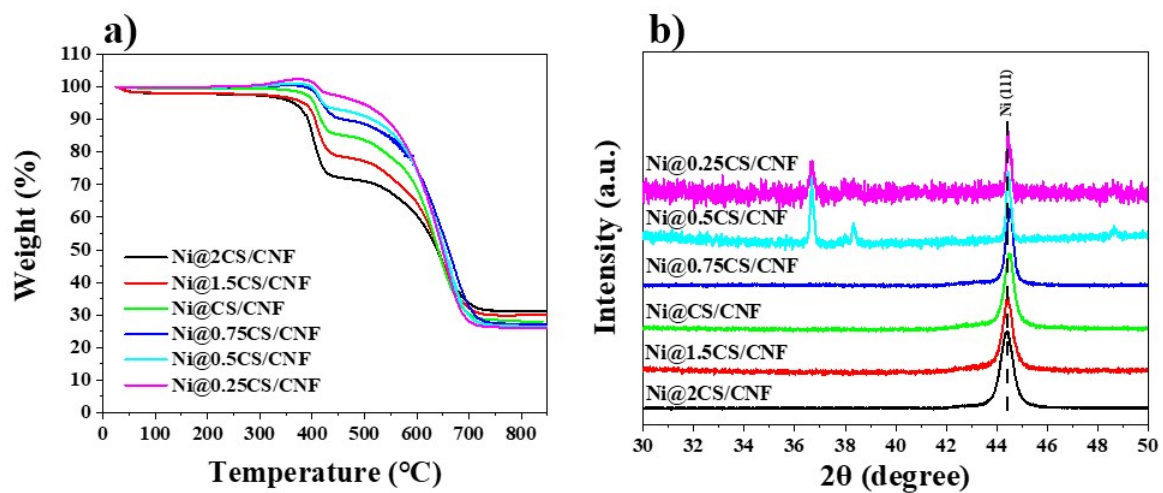

**Figure S1.** (a) TGA profiles of different Ni@nCS/CNF catalysts before acid treatment and (b) XRD patterns of different Ni@nCS/CNF catalysts before acid treatment.

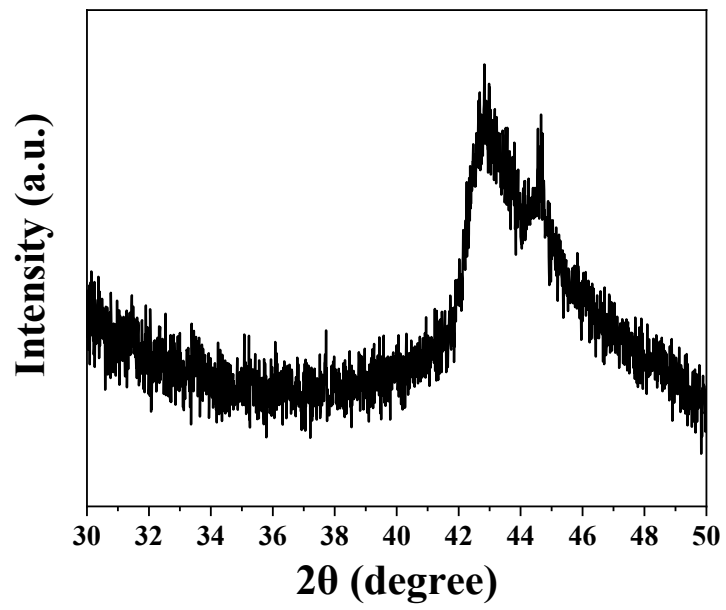

*Figure S2. XRD pattern of CNF.*

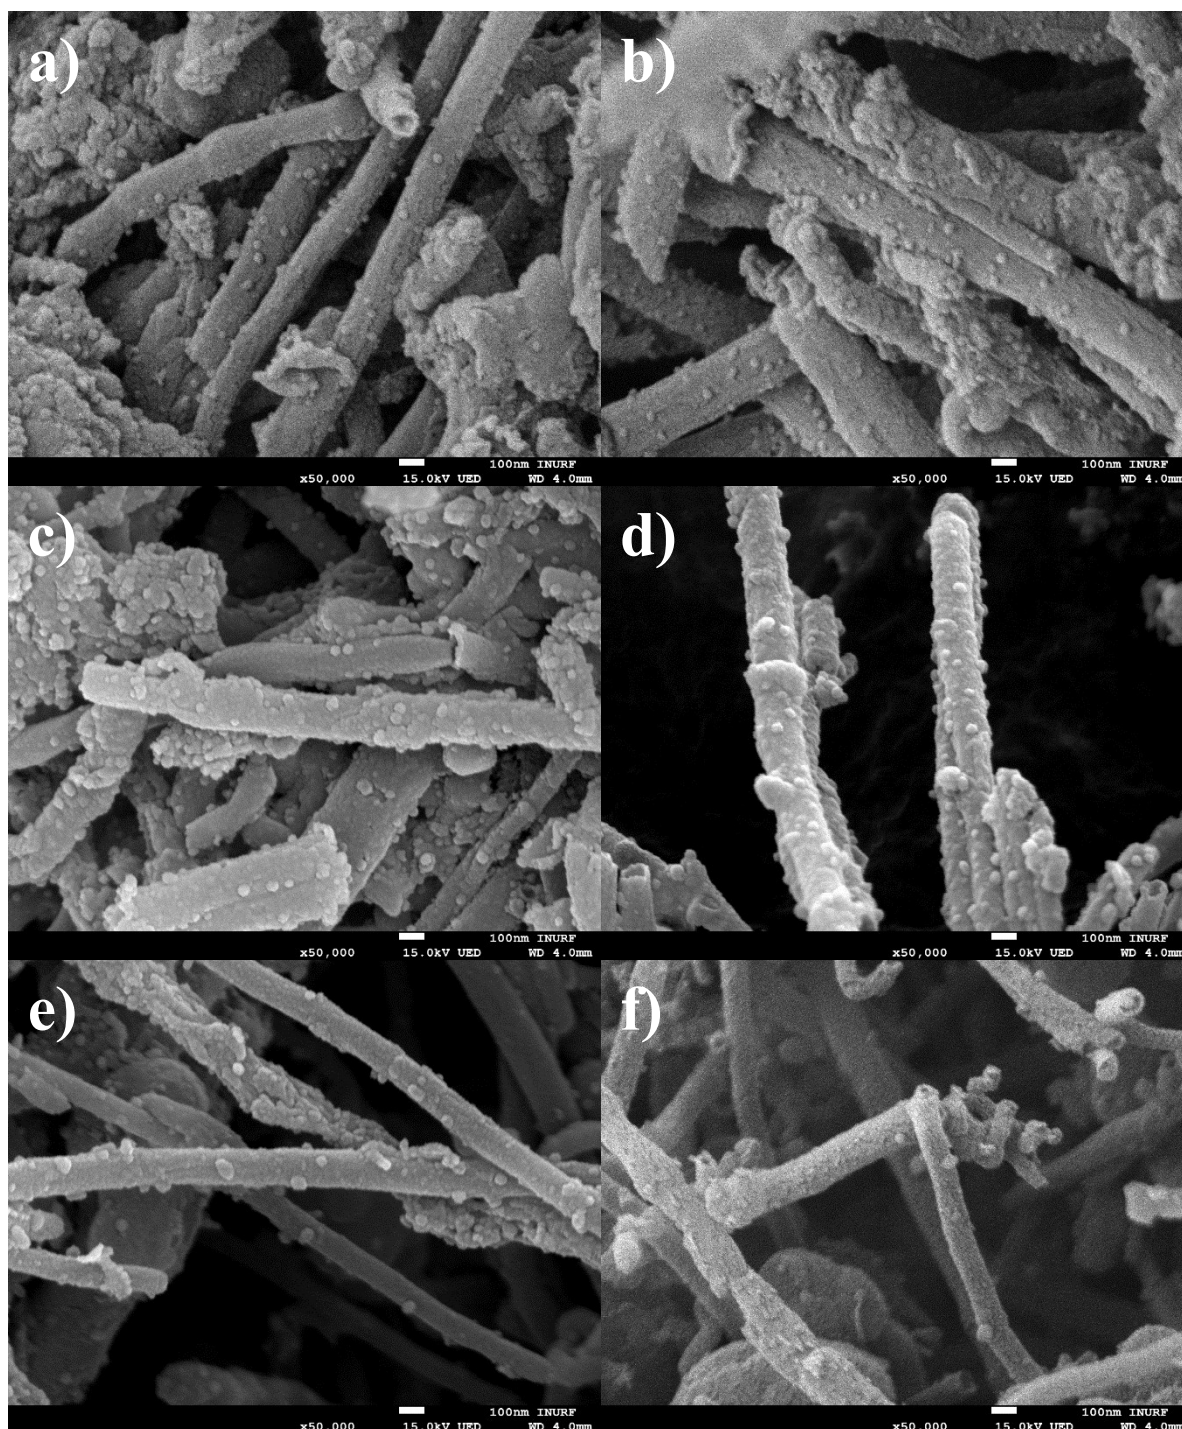

**Figure S3.** FE-SEM images of (a) Ni@2CS/CNF, (b) Ni@1.5CS/CNF, (c) Ni@CS/CNF, (d) Ni@0.75CS/CNF, (e) Ni@0.5CS/CNF and (f) Ni@0.25CS/CNF

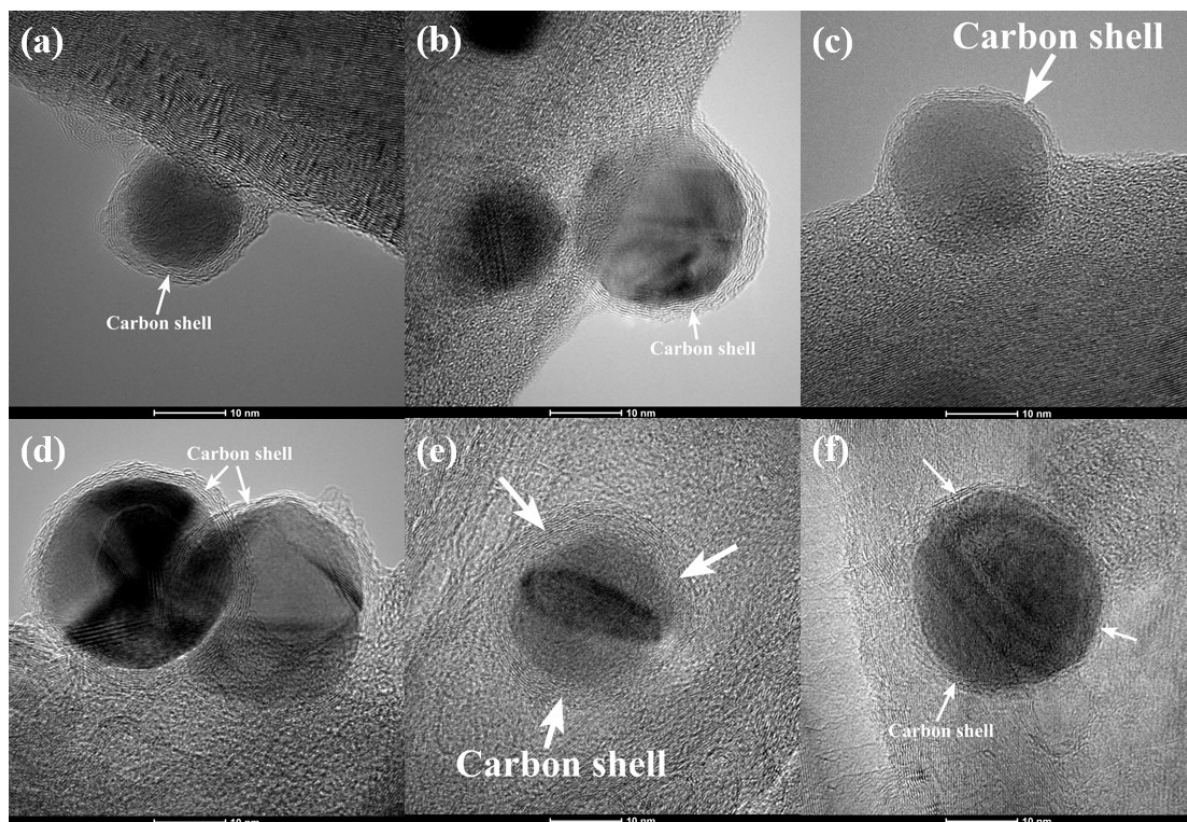

**Figure S4.** HR-TEM images of (a) Ni@2CS/CNF, (b) Ni@1.5CS/CNF, (c) Ni@CS/CNF, (d) Ni@0.75CS/CNF, (e) Ni@0.5CS/CNF and (f) Ni@0.25CS/CNF at a scale of 10 nm. The white arrows indicate the carbon shell.

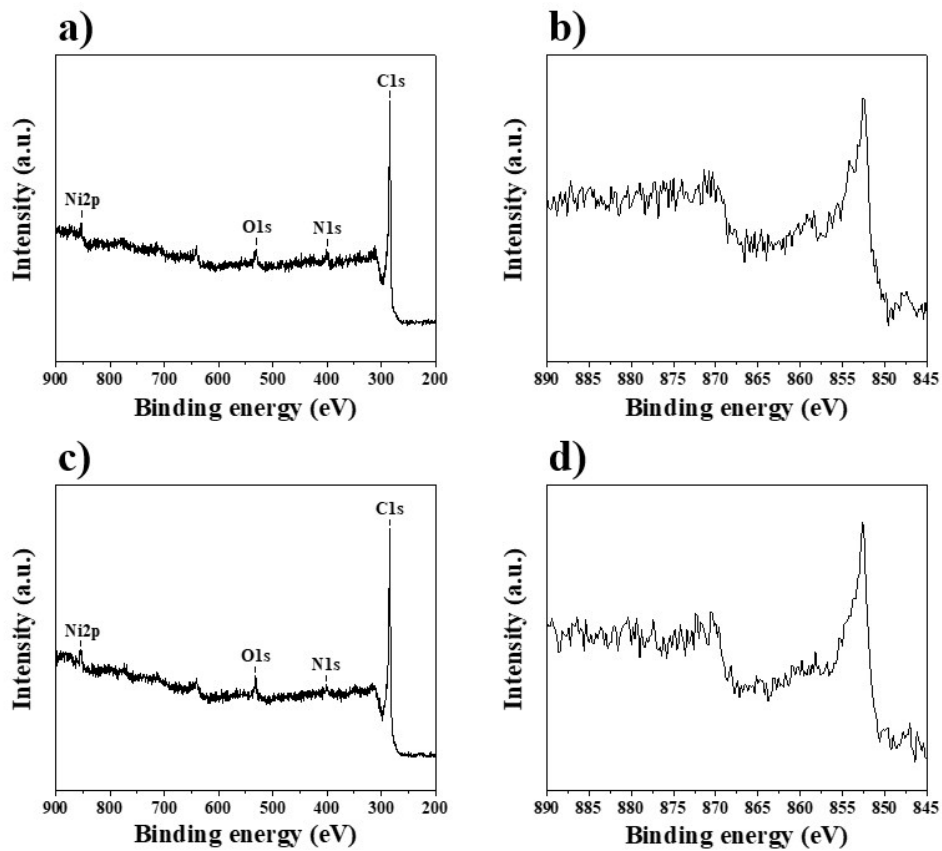

**Figure S5.** (a) Survey scan XPS spectra of Ni@1.5CS/CNF, (b) Ni2p XPS spectra of Ni@1.5CS/CNF, (c) Survey scan XPS spectra of Ni@CS/CNF and (d) Ni2p XPS spectra of Ni@CS/CNF.

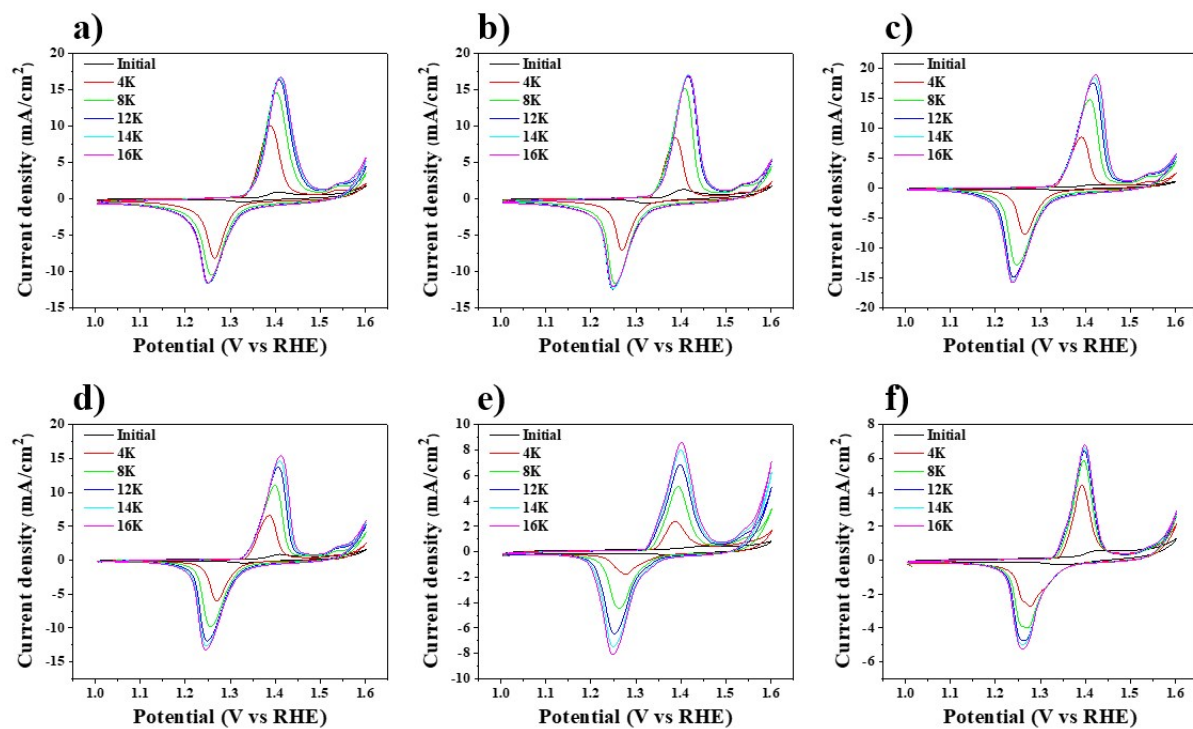

**Figure S6.** Cyclic voltammograms in activation step of (a) Ni@2CS/CNF, (b) Ni@1.5CS/CNF, (c) Ni@CS/CNF, (d) Ni@0.75CS/CNF, (e) Ni@0.5CS/CNF and (f) Ni@0.25CS/CNF.



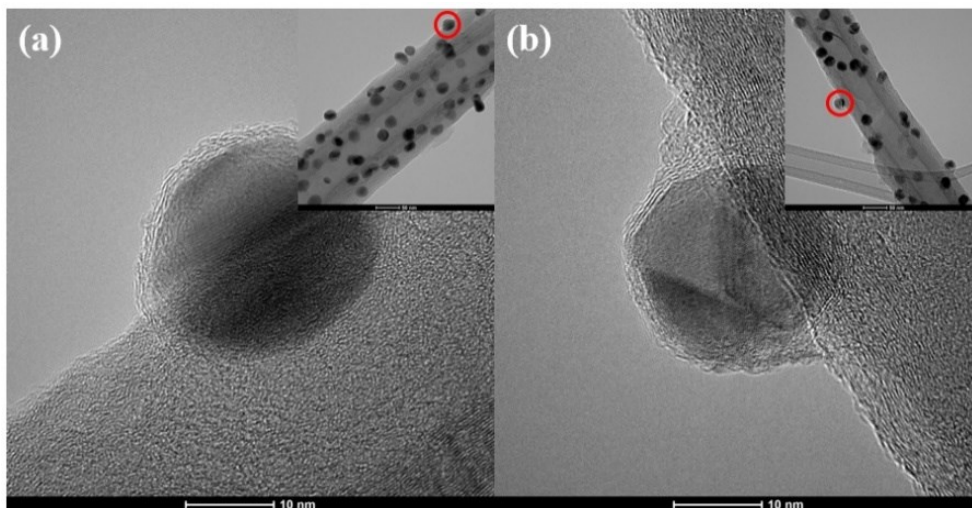

**Figure S7.** HR-TEM images of Ni@2CS/CNF (a) before and (b) after activation at a scale of 10 nm. The insets show HR-TEM images at a scale of 50 nm.

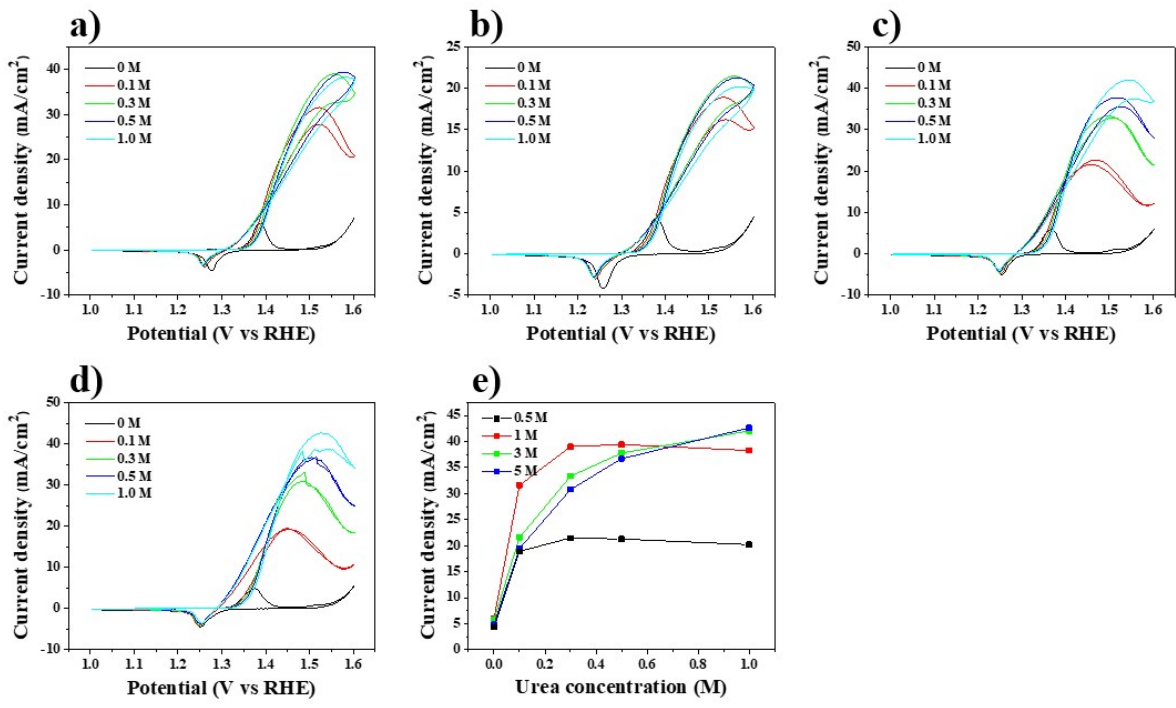

**Figure S8.** Cyclic voltammograms of the UOR on Ni@2CS/CNF at different urea concentration in (a) 1 M KOH, (b) 0.5 M KOH, (c) 3 M KOH and (d) 5 M KOH, and (e) Plot of anodic peak current density vs. urea concentration in different KOH electrolyte.

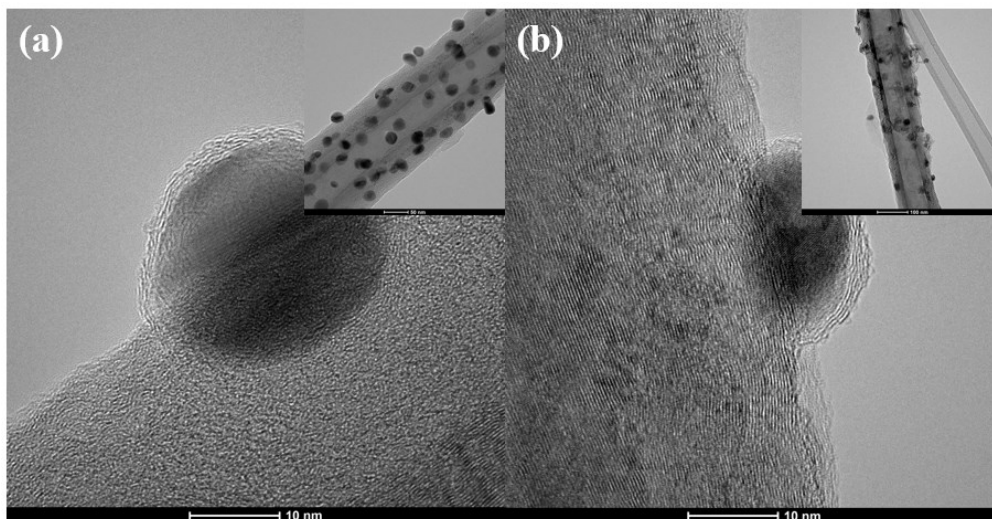

**Figure S9.** HR-TEM images of Ni@2CS/CNF (a) before and (b) after durability test at a scale of 10 nm. The insets show HR-TEM images at a scale of 50 nm.

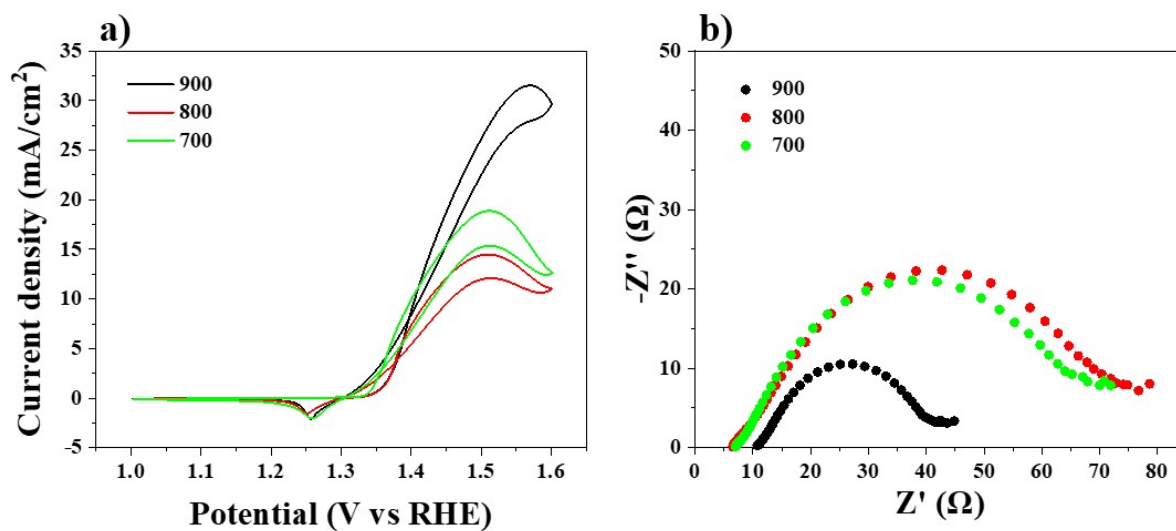

**Figure S10.** (a) Cyclic voltammograms of the UOR on Ni@2CS/CNF catalysts synthesized at different temperature in 0.3 M/1 M KOH and (b) Nyquist plots of Ni@2CS/CNF catalysts synthesized at different temperature in 0.3 M/1 M KOH.

## REFERENCE

- 1 P. Basumatary, D. Konwar and Y. S. Yoon, *Electrochim. Acta*, 2018, **261**, 78–85.
- 2 S. Wang, X. Yang, Z. Liu, D. Yang and L. Feng, *Nanoscale*, 2020, **12**, 10827–10833.
- 3 K. Ye, H. Zhang, L. Zhao, X. Huang, K. Cheng, G. Wang and D. Cao, *New J. Chem.*, 2016, **40**, 8673–8680.
